# Supplementary material for: Radical Reaction Control in the AdoMet Radical Enzyme CDG Synthase (QueE): Consolidate, Destabilize, Accelerate
Source: PubMed Central journal article supplement (PMC5347944; doi:10.1002/chem.201604719), 2016-12-13
Supplement: CHEM-23-953-s001.pdf [file CHEM-23-953-s001.pdf]

# CHEMISTRY

## A **European** Journal

### Supporting Information

#### **Radical Reaction Control in the AdoMet Radical Enzyme CDG Synthase (QueE): Consolidate, Destabilize, Accelerate**

Christof M. Jäger\* and Anna K. Croft\*[a]

chem\_201604719\_sm\_miscellaneous\_information.pdf

# Supporting Information

**Table S1.** Detailed results of *ab initio* and DFT calculations. B3LYP/6-31+G(d) optimizations.

**Table S2.** Detailed results of *ab initio* and DFT calculations. BMK/6-31+G(2df,p) optimizations.

**Table S3.** Detailed results of *ab initio* and DFT energy calculations.

**Table S4.** Important interatomic distances. Units in Ångstrom.

**Table S5.** Mulliken atomic Spin densities >0.1.

**Table S6.** Detailed results of *ab initio* and DFT calculations. G3B3 results.

**Table S7.** Calculated relative energies for the radical rearrangements of **3** complexed to different ions.

**Table S8.** Calculated radical stabilization enthalpies for the rearrangement of **3** complexed to different ions at 298.15 K.

**Scheme S1.** Conformer nomenclature of CPH4.

Additionally, QM calculation output files and molecular structures can be found on figshare:

Jaeger, Christof (2016): Supplementary material for "Radical Reaction Control in the AdoMet Radical Enzyme CDG Synthase (QueE): Consolidate, Destabilize, Accelerate". figshare.

<https://dx.doi.org/10.6084/m9.figshare.c.3574113.v1>

**Table S1.** Detailed results of *ab initio* and DFT calculations. B3LYP/6-31+G(d) optimizations.

| B3LYP/6-31+G(d)     |                                |                  |                 |                 |       |                            |                            |
|---------------------|--------------------------------|------------------|-----------------|-----------------|-------|----------------------------|----------------------------|
| Name                | Electronic energy<br>[Hartree] | ZPE<br>[Hartree] | cH<br>[Hartree] | cG<br>[Hartree] | nimag | dE<br>Etot+ZPE<br>[KJ/mol] | RSE<br>Etot+cH<br>[KJ/mol] |
| <b>1a</b>           | -771.1292190                   | 0.1704312        | 0.183987        | 0.131174        | 0     | 0.0                        |                            |
| <b>1b</b>           | -771.1253198                   | 0.1708649        | 0.184459        | 0.131174        | 0     | 11.4                       |                            |
| <b>3</b>            | -770.4927925                   | 0.1568494        | 0.170626        | 0.116831        | 0     | 0.0                        | -104.9                     |
| <b>4</b>            | -770.4307542                   | 0.1550377        | 0.168316        | 0.115511        | 1     | 158.1                      |                            |
| <b>5</b>            | -770.4394744                   | 0.1556640        | 0.169394        | 0.115659        | 0     | 136.9                      |                            |
| <b>6</b>            | -770.4329819                   | 0.1547460        | 0.168099        | 0.115314        | 1     | 151.5                      |                            |
| <b>7</b>            | -770.4194935                   | 0.1541816        | 0.167977        | 0.113532        | 1     | 185.4                      |                            |
| <b>8</b>            | -770.4424673                   | 0.1551995        | 0.170017        | 0.111897        | 0     | 127.8                      | 25.7                       |
| <b>9</b>            | -770.4166968                   | 0.1542722        | 0.168131        | 0.113853        | 1     | 193.0                      |                            |
| <b>10</b>           | -770.4601402                   | 0.1546542        | 0.169002        | 0.113256        | 0     | 80.0                       | -53.2                      |
| <b>(10-H)</b>       | -771.1173907                   | 0.1698691        | 0.183953        | 0.129815        | 0     | 29.6                       |                            |
| <b>11</b>           | -770.4602438                   | 0.1541598        | 0.114271        | 0.114271        | 1     | 78.4                       |                            |
| <b>12</b>           | -770.4810930                   | 0.1545484        | 0.168888        | 0.111980        | 0     | 24.7                       |                            |
| <b>1aHcis</b>       | -771.6605858                   | 0.1835654        | 0.197543        | 0.143416        | 0     | 4.8                        |                            |
| <b>3Hcis</b>        | -771.0449564                   | 0.1709745        | 0.184884        | 0.131095        | 0     | 0.0                        | -157.6                     |
| <b>10Hcis</b>       | -770.9969400                   | 0.1685024        | 0.182797        | 0.127890        | 0     | 119.6                      | -37.4                      |
| <b>(10H-H)cis</b>   | -771.6597591                   | 0.1829809        | 0.197296        | 0.142945        | 0     | 5.4                        |                            |
| <b>4Hcis</b>        | -770.9746563                   | 0.1684873        | 0.181840        | 0.129344        | 1     | 178.0                      |                            |
| <b>5Hcis</b>        | -770.9757690                   | 0.1691981        | 0.182962        | 0.129467        | 0     | 177.0                      |                            |
| <b>6Hcis</b>        | -770.9714727                   | 0.1681739        | 0.181716        | 0.128720        | 1     | 185.6                      |                            |
| <b>1aHtrans</b>     | -771.6625348                   | 0.1836874        | 0.197559        | 0.144090        | 0     | 0.0                        |                            |
| <b>3Htrans</b>      | -771.0448138                   | 0.1710401        | 0.184916        | 0.131193        | 0     | 0.5                        | -152.1                     |
| <b>10Htrans</b>     | -770.9959704                   | 0.1683435        | 0.182675        | 0.127889        | 0     | 121.7                      | -30.5                      |
| <b>(10H-H)trans</b> | -771.6597591                   | 0.1829809        | 0.197296        | 0.142945        | 0     | 5.4                        |                            |
| <b>4Htrans</b>      | -770.9737602                   | 0.1684878        | 0.181829        | 0.129362        | 1     | 180.4                      |                            |
| <b>5Htrans</b>      | -770.9748748                   | 0.1691723        | 0.182945        | 0.129352        | 0     | 179.3                      |                            |
| <b>6Htrans</b>      | -770.9706581                   | 0.1679957        | 0.181597        | 0.128386        | 1     | 187.2                      |                            |
| <b>7Htrans</b>      | -770.9461478                   | 0.1675762        | 0.181672        | 0.126512        | 1     | 250.5                      |                            |
| <b>13</b>           | -568.6961805                   | 0.1416258        | 0.154021        | 0.102874        | 0     | 0.0                        | -99.7                      |
| <b>(13-H)</b>       | -569.3343525                   | 0.1545761        | 0.167162        | 0.116311        | 0     | 0.0                        |                            |
| <b>14</b>           | -568.6520383                   | 0.1400256        | 0.152059        | 0.102454        | 1     | 111.7                      |                            |
| <b>15</b>           | -568.6664871                   | 0.1408978        | 0.152830        | 0.104123        | 0     | 76.0                       |                            |

|                       |               |           |          |          |   |       |        |
|-----------------------|---------------|-----------|----------|----------|---|-------|--------|
| <b>17</b>             | -568.6727209  | 0.1408364 | 0.153044 | 0.102542 | 0 | 59.5  | -44.1  |
| <b>(17-H)</b>         | -569.3332422  | 0.1556521 | 0.167792 | 0.118703 | 0 | 5.7   |        |
| <b>13H</b>            | -569.2415038  | 0.1559037 | 0.168531 | 0.117003 | 0 | 0.0   | -126.9 |
| <b>(13-H)H</b>        | -569.8687294  | 0.1680849 | 0.181078 | 0.129042 | 0 | 0.0   |        |
| <b>14H</b>            | -569.1823114  | 0.1522403 | 0.164916 | 0.113665 | 1 | 145.8 | 19.0   |
| <b>15H</b>            | -569.1853723  | 0.1532281 | 0.166055 | 0.115410 | 0 | 140.3 | 14.0   |
| <b>16H</b>            | -569.1835730  | 0.1525651 | 0.164937 | 0.115095 | 1 | 143.3 | 15.8   |
| <b>17H</b>            | -569.1946062  | 0.1538261 | 0.166573 | 0.115810 | 0 | 117.7 | -33.3  |
| <b>(17-H)H</b>        | -569.8591811  | 0.1685928 | 0.181272 | 0.131170 | 0 | 26.4  |        |
| <b>1Mg4H2O</b>        | -1276.8707682 | 0.2755115 | 0.300603 | 0.223995 | 0 | 0.0   |        |
| <b>3Mg4H2O</b>        | -1276.2121848 | 0.2617722 | 0.287155 | 0.209541 | 0 | 0.0   | -46.9  |
| <b>4Mg4H2O</b>        | -1276.1804242 | 0.2592579 | 0.284237 | 0.207489 | 1 | 76.8  | 28.8   |
| <b>5Mg4H2O</b>        | -1276.1859157 | 0.2600679 | 0.285453 | 0.207917 | 0 | 64.5  | 17.6   |
| <b>6Mg4H2O</b>        | -1276.1838951 | 0.2591059 | 0.284242 | 0.207133 | 1 | 67.3  | 19.7   |
| <b>10Mg4H2O</b>       | -1276.2102631 | 0.2593527 | 0.285287 | 0.206559 | 0 | -1.3  | -34.2  |
| <b>(10-H)Mg4H2O</b>   | -1276.8742305 | 0.2736847 | 0.299725 | 0.221262 | 0 | -13.9 |        |
| <b>1Mg3H2O</b>        | -1200.4205935 | 0.2497339 | 0.272411 | 0.200735 | 0 | 0.0   |        |
| <b>(10-H)Mg3H2O</b>   | -1200.4271614 | 0.2482019 | 0.271504 | 0.198827 | 0 | -21.3 |        |
| <b>3Mg3H2O</b>        | -1199.7641487 | 0.2364140 | 0.259168 | 0.186734 | 0 | 0.0   | -52.0  |
| <b>4Mg3H2O</b>        | -1199.7332345 | 0.2336947 | 0.256098 | 0.184616 | 1 | 74.0  | 21.1   |
| <b>5Mg3H2O</b>        | -1199.7392633 | 0.2346667 | 0.257412 | 0.185289 | 0 | 60.7  | 8.7    |
| <b>6Mg3H2O</b>        | -1199.7368643 | 0.2336900 | 0.256167 | 0.184559 | 1 | 64.5  | 11.8   |
| <b>10Mg3H2O</b>       | -1199.7619031 | 0.2339310 | 0.257185 | 0.183968 | 0 | -0.6  | -30.5  |
| <b>11Mg3H2O</b>       | -1199.7186663 | 0.2329909 | 0.255694 | 0.183194 | 1 | 110.4 |        |
| <b>12Mg3H2O</b>       | -1199.7411615 | 0.2332050 | 0.256893 | 0.181787 | 0 | 51.9  | 2.4    |
| <b>1HMg4H2O</b>       | -1277.1584907 | 0.2875571 | 0.313149 | 0.236238 | 0 | 0.0   |        |
| <b>(10-H)HMg4H2O</b>  | -1277.1439893 | 0.2842331 | 0.313149 | 0.236238 | 0 | 29.3  |        |
| <b>3HMg4H2O</b>       | -1276.5067137 | 0.2730379 | 0.299759 | 0.219393 | 0 | 0.0   | -64.6  |
| <b>10HMg4H2O</b>      | -1276.4748031 | 0.2699830 | 0.297401 | 0.214883 | 0 | 75.8  | -23.9  |
| <b>1Mg2H2OOH</b>      | -1200.0177205 | 0.2387685 | 0.259850 | 0.191720 | 0 | 0.0   |        |
| <b>(10-H)Mg2H2OOH</b> | -1200.0195284 | 0.2362982 | 0.258256 | 0.187573 | 0 | -11.2 |        |
| <b>3Mg2H2OOH</b>      | -1199.3619619 | 0.2254943 | 0.246725 | 0.177255 | 0 | 0.0   | -53.5  |
| <b>4Mg2H2OOH</b>      | -1199.3273290 | 0.2220283 | 0.243207 | 0.174199 | 1 | 81.8  |        |
| <b>5Mg2H2OOH</b>      | -1199.3351564 | 0.2227119 | 0.244185 | 0.174204 | 0 | 63.1  |        |
| <b>6Mg2H2OOH</b>      | -1199.3316931 | 0.2216684 | 0.242899 | 0.173396 | 1 | 69.4  |        |
| <b>10Mg2H2OOH</b>     | -1199.3570841 | 0.2219313 | 0.243905 | 0.172483 | 0 | 3.5   | -38.0  |
| <b>13Mg4H2O</b>       | -1074.4169550 | 0.2465247 | 0.270485 | 0.195887 | 0 | 0.0   | -80.2  |

|                     |               |           |          |          |   |       |        |
|---------------------|---------------|-----------|----------|----------|---|-------|--------|
| <b>(13-H)Mg4H2O</b> | -1075.0625680 | 0.2594717 | 0.283625 | 0.209192 | 0 | 0.0   |        |
| <b>14Mg4H2O</b>     | -1074.3813544 | 0.2427186 | 0.266947 | 0.191870 | 1 | 83.5  |        |
| <b>15Mg4H2O</b>     | -1074.3845570 | 0.2440192 | 0.268356 | 0.193188 | 0 | 78.5  |        |
| <b>16Mg4H2O</b>     | -1074.3719365 | 0.2430890 | 0.266979 | 0.192959 | 1 | 109.2 |        |
| <b>17Mg4H2O</b>     | -1074.4039183 | 0.2455702 | 0.269299 | 0.196508 | 0 | 31.7  | -25.0  |
| <b>(17-H)Mg4H2O</b> | -1075.0718156 | 0.2608401 | 0.284169 | 0.212982 | 0 | -20.7 |        |
| <b>3Ca4H2O</b>      | -1753.7111031 | 0.2602369 | 0.286183 | 0.206041 | 0 | 0.0   | -64.3  |
| <b>4Ca4H2O</b>      | -1753.6758830 | 0.2575668 | 0.255206 | 0.180040 | 1 | 85.5  |        |
| <b>5Ca4H2O</b>      | -1753.6808380 | 0.2581670 | 0.284300 | 0.203467 | 0 | 74.0  | 10.2   |
| <b>6Ca4H2O</b>      | -1753.6786772 | 0.2572316 | 0.255204 | 0.179750 | 1 | 77.2  |        |
| <b>10Ca4H2O</b>     | -1753.7047679 | 0.2573560 | 0.284090 | 0.201853 | 0 | 9.1   | -35.5  |
| <b>1Ca4H2O</b>      | -1754.3625633 | 0.2726484 | 0.299118 | 0.217614 | 0 | 0.0   |        |
| <b>(10-H)Ca4H2O</b> | -1754.3682527 | 0.2718358 | 0.298540 | 0.217192 | 0 | -17.1 |        |
| <b>3Mn4H2O</b>      | -2227.0030137 | 0.2600383 | 0.286332 | 0.203626 | 0 | 0.0   | -49.9  |
| <b>4Mn4H2O</b>      | -2226.9701740 | 0.2574275 | 0.283181 | 0.202340 | 1 | 79.4  |        |
| <b>6Mn4H2O</b>      | -2226.9718677 | 0.2573593 | 0.283286 | 0.202120 | 1 | 74.7  |        |
| <b>10Mn4H2O</b>     | -2226.9999322 | 0.2571365 | 0.284108 | 0.200529 | 0 | 0.5   | -33.7  |
| <b>1Mn4H2O</b>      | -2227.6605862 | 0.2742922 | 0.299895 | 0.220134 | 0 | 0.0   |        |
| <b>(10-H)Mn4H2O</b> | -2227.6640818 | 0.2714849 | 0.298520 | 0.215008 | 0 | -16.5 |        |
| <b>3Na4H2O</b>      | -1238.5917086 | 0.2591431 | 0.285791 | 0.202417 | 0 | 0.0   | -140.1 |
| <b>4Na4H2O</b>      | -1238.5342172 | 0.2580153 | 0.283485 | 0.203531 | 1 | 148.0 |        |
| <b>5Na4H2O</b>      | -1238.5408460 | 0.2586374 | 0.284717 | 0.203454 | 0 | 132.2 |        |
| <b>6Na4H2O</b>      | -1238.5385240 | 0.2577078 | 0.283363 | 0.203230 | 1 | 135.9 |        |
| <b>10Na4H2O</b>     | -1238.5635559 | 0.2582064 | 0.284485 | 0.203093 | 0 | 71.5  | -44.4  |
| <b>1Na4H2O</b>      | -1239.2143606 | 0.2736963 | 0.298782 | 0.220456 | 1 | 0.0   |        |
| <b>(10-H)Na4H2O</b> | -1239.2237869 | 0.2724636 | 0.299082 | 0.217000 | 0 | -28.0 |        |
| <b>3Na3H2O</b>      | -1162.1437422 | 0.2341230 | 0.258007 | 0.180880 | 0 | 0.0   | -96.6  |
| <b>4Na3H2O</b>      | -1162.0914971 | 0.2315672 | 0.255025 | 0.178476 | 1 | 130.5 |        |
| <b>5Na3H2O</b>      | -1162.0953932 | 0.2324760 | 0.256427 | 0.178749 | 0 | 122.6 |        |
| <b>6Na3H2O</b>      | -1162.0925921 | 0.2319907 | 0.255319 | 0.180106 | 1 | 128.7 |        |
| <b>10Na3H2O</b>     | -1162.1180476 | 0.2323099 | 0.256363 | 0.179460 | 0 | 62.7  | -39.1  |
| <b>1Na3H2O</b>      | -1162.7832402 | 0.2477738 | 0.271288 | 0.195634 | 0 | 0.0   |        |
| <b>(10-H)Na3H2O</b> | -1162.7800836 | 0.2467395 | 0.270747 | 0.194717 | 0 | 5.6   |        |
| <b>3K4H2O</b>       | -1676.1983170 | 0.2595209 | 0.285983 | 0.200659 | 0 | 0.0   | -136.8 |
| <b>4K4H2O</b>       | -1676.1419209 | 0.2575469 | 0.283280 | 0.200938 | 1 | 142.9 |        |
| <b>5K4H2O</b>       | -1676.1493400 | 0.2579485 | 0.284315 | 0.200826 | 0 | 124.5 |        |
| <b>6K4H2O</b>       | -1676.1457916 | 0.2569084 | 0.283028 | 0.200060 | 1 | 131.0 |        |
| <b>10K4H2O</b>      | -1676.1708131 | 0.2573926 | 0.284176 | 0.199871 | 0 | 66.6  | -36.9  |

|                    |               |           |          |          |   |       |
|--------------------|---------------|-----------|----------|----------|---|-------|
| <b>1K4H2O</b>      | -1676.8218751 | 0.2717044 | 0.298630 | 0.211703 | 0 | 0.0   |
| <b>(10-H)K4H2O</b> | -1676.8337519 | 0.2719771 | 0.298610 | 0.215024 | 0 | -30.5 |
| <b>AdoH</b>        | -887.6906435  | 0.2312361 | 0.248248 | 0.186006 |   |       |
| <b>AdoR</b>        | -888.3634183  | 0.2465382 | 0.263125 | 0.202497 |   |       |

**Table S2.** Detailed results of *ab initio* and DFT calculations. BMK/6-31+G(2df,p) optimizations.

| Name               | BMK/6-31G+G(2df,p)             |                  |                 |                 |       | dE                   | RSE                 |
|--------------------|--------------------------------|------------------|-----------------|-----------------|-------|----------------------|---------------------|
|                    | Electronic energy<br>[Hartree] | ZPE<br>[Hartree] | cH<br>[Hartree] | cG<br>[Hartree] | nimag | Etot+ZPE<br>[KJ/mol] | Etot+cH<br>[KJ/mol] |
| <b>1a</b>          | -770.7948381                   | 0.1731361        | 0.186545        | 0.133934        | 0     | 0.0                  |                     |
| <b>1b</b>          | -770.7918487                   | 0.1741983        | 0.187495        | 0.134823        | 0     | 10.6                 |                     |
| <b>3</b>           | -770.1557182                   | 0.1595765        | 0.173206        | 0.119650        | 0     | 0.0                  | -95.6               |
| <b>4</b>           | -770.1005968                   | 0.1585211        | 0.171491        | 0.119322        | 1     | 142.0                |                     |
| <b>5</b>           | -770.1103175                   | 0.1581125        | 0.171780        | 0.118159        | 0     | 115.4                |                     |
| <b>6</b>           | -770.1024808                   | 0.1573918        | 0.170607        | 0.118130        | 1     | 134.0                |                     |
| <b>7</b>           | -770.0788944                   | 0.1570890        | 0.170742        | 0.116602        | 1     | 195.2                |                     |
| <b>8</b>           | -770.1014591                   | 0.1585074        | 0.173039        | 0.115560        | 0     | 139.7                |                     |
| <b>9</b>           | -770.0750589                   | 0.1571772        | 0.170803        | 0.116981        | 1     | 205.5                |                     |
| <b>10</b>          | -770.1263584                   | 0.1578370        | 0.171722        | 0.117534        | 0     | 72.5                 | -51.2               |
| <b>(10-H)</b>      | -770.7872829                   | 0.1730003        | 0.186921        | 0.132688        | 0     | 19.5                 |                     |
| <b>11</b>          | -770.1174444                   | 0.1566697        | 0.170058        | 0.116948        | 1     | 92.9                 |                     |
| <b>12</b>          | -770.1402944                   | 0.1577396        | 0.171789        | 0.115958        | 0     | 35.7                 |                     |
| <b>1aHcis</b>      | -771.3349790                   | 0.1866726        | 0.200505        | 0.146569        | 0     | 0.0                  | -148.7              |
| <b>3Hcis</b>       | -770.7167386                   | 0.1740984        | 0.187831        | 0.134452        | 0     | 0.0                  | -36.4               |
| <b>10Hcis</b>      | -770.6724120                   | 0.1713404        | 0.185526        | 0.130976        | 0     | 109.1                |                     |
| <b>(10-H)cis</b>   | -771.3384676                   | 0.1861132        | 0.200244        | 0.146730        | 0     | -3.9                 |                     |
| <b>4Hcis</b>       | -770.6532090                   | 0.1710740        | 0.184321        | 0.132052        | 1     | 158.9                |                     |
| <b>5Hcis</b>       | -770.6536874                   | 0.1715562        | 0.185378        | 0.131299        | 0     | 158.9                |                     |
| <b>6Hcis</b>       | -770.6493238                   | 0.1711167        | 0.184551        | 0.131680        | 1     | 169.2                |                     |
| <b>1aHtrans</b>    | -771.3372400                   | 0.1863534        | 0.200110        | 0.146957        | 0     | 0.0                  | -141.3              |
| <b>3Htrans</b>     | -770.7167183                   | 0.1742781        | 0.187962        | 0.134676        | 0     | 0.5                  | -29.0               |
| <b>10Htrans</b>    | -770.6711990                   | 0.1713721        | 0.185581        | 0.130988        | 0     | 112.4                |                     |
| <b>(10-H)trans</b> | -771.3399587                   | 0.1859090        | 0.200158        | 0.146085        | 0     | -8.3                 |                     |
| <b>4Htrans</b>     | -770.6522207                   | 0.1715299        | 0.184691        | 0.132667        | 1     | 162.6                |                     |

|                       |               |           |          |          |   |       |        |
|-----------------------|---------------|-----------|----------|----------|---|-------|--------|
| <b>5Htrans</b>        | -770.6526871  | 0.1719637 | 0.185581 | 0.132408 | 0 | 162.6 |        |
| <b>6Htrans</b>        | -770.6482255  | 0.1706927 | 0.184237 | 0.131072 | 1 | 170.9 |        |
| <b>13H</b>            | -568.9856196  | 0.1599458 | 0.172109 | 0.121834 | 0 | 0.0   | -116.0 |
| <b>(13-H)H</b>        | -569.6150460  | 0.1708064 | 0.183540 | 0.132261 | 0 | 0.0   |        |
| <b>14H</b>            | -568.9263053  | 0.1558494 | 0.167719 | 0.118975 | 1 | 145.0 |        |
| <b>15H</b>            | -568.9375173  | 0.1558370 | 0.168389 | 0.118410 | 0 | 115.5 |        |
| <b>16H</b>            | -568.9355186  | 0.1552693 | 0.167309 | 0.118373 | 1 | 119.3 |        |
| <b>17H</b>            | -568.9412116  | 0.1563108 | 0.168882 | 0.118617 | 0 | 107.0 | -22.4  |
| <b>(17-H)H</b>        | -569.6093995  | 0.1708173 | 0.183405 | 0.133584 | 0 | 14.9  |        |
| <b>1Mg4H2O</b>        | -1276.4017661 | 0.2822638 | 0.306504 | 0.232509 | 0 | 0.0   |        |
| <b>3Mg4H2O</b>        | -1275.7394525 | 0.2695054 | 0.293824 | 0.219736 | 0 | 0.0   | -33.0  |
| <b>4Mg4H2O</b>        | -1275.7148606 | 0.2657566 | 0.290074 | 0.216035 | 1 | 54.7  |        |
| <b>5Mg4H2O</b>        | -1275.7192015 | 0.2670455 | 0.291558 | 0.217101 | 0 | 46.7  |        |
| <b>6Mg4H2O</b>        | -1275.7174750 | 0.2660831 | 0.290421 | 0.216049 | 1 | 48.7  |        |
| <b>10Mg4H2O</b>       | -1275.7421977 | 0.2667142 | 0.291774 | 0.216051 | 0 | -14.5 | -32.4  |
| <b>(10-H)Mg4H2O</b>   | -1276.4092994 | 0.2807059 | 0.306006 | 0.230137 | 0 | -23.9 |        |
| <b>1Mg3H2O</b>        | -1199.9735038 | 0.2564810 | 0.277001 | 0.209937 | 0 | 0.0   |        |
| <b>(10-H)Mg3H2O</b>   | -1199.9841622 | 0.2542650 | 0.276857 | 0.206062 | 0 | -33.8 |        |
| <b>3Mg3H2O</b>        | -1199.3129730 | 0.2424383 | 0.264552 | 0.193733 | 0 | 0.0   | -37.0  |
| <b>4Mg3H2O</b>        | -1199.2898528 | 0.2399905 | 0.261606 | 0.192402 | 1 | 54.3  |        |
| <b>5Mg3H2O</b>        | -1199.2949210 | 0.2402906 | 0.262472 | 0.191885 | 0 | 41.8  |        |
| <b>6Mg3H2O</b>        | -1199.2927638 | 0.2394727 | 0.261410 | 0.191312 | 1 | 45.3  |        |
| <b>10Mg3H2O</b>       | -1199.3157439 | 0.2397573 | 0.262237 | 0.191101 | 0 | -14.3 | -30.0  |
| <b>11Mg3H2O</b>       | -1199.2566171 | 0.2381532 | 0.260268 | 0.189584 | 1 | 136.7 |        |
| <b>12Mg3H2O</b>       | -1199.2831089 | 0.2399861 | 0.262802 | 0.190158 | 0 | 72.0  | 36.8   |
| <b>1Mg2H2OOH</b>      | -1199.5622738 | 0.2439621 | 0.264629 | 0.197732 | 0 | 0.0   |        |
| <b>(10-H)Mg2H2OOH</b> | -1199.5702953 | 0.2423228 | 0.263916 | 0.194640 | 0 | -25.4 |        |
| <b>3Mg2H2OOH</b>      | -1198.9024901 | 0.2304761 | 0.251674 | 0.182137 | 0 | 0.0   | -40.3  |
| <b>4Mg2H2OOH</b>      | -1198.8779847 | 0.2289130 | 0.249271 | 0.182200 | 1 | 60.2  |        |
| <b>5Mg2H2OOH</b>      | -1198.8842648 | 0.2279413 | 0.249100 | 0.180207 | 0 | 41.2  |        |
| <b>6Mg2H2OOH</b>      | -1198.8810298 | 0.2275142 | 0.248280 | 0.180322 | 1 | 48.6  |        |
| <b>10Mg2H2OOH</b>     | -1198.9049254 | 0.2283828 | 0.249763 | 0.180335 | 0 | -11.9 | -36.8  |
| <b>13Mg4H2O</b>       | -1074.0150459 | 0.2530497 | 0.276306 | 0.203820 | 0 | 0     | -68.8  |
| <b>(13-H)Mg4H2O</b>   | -1074.6635129 | 0.2653546 | 0.288810 | 0.216364 | 0 | 0.0   |        |
| <b>14Mg4H2O</b>       | -1073.9879348 | 0.2495818 | 0.272525 | 0.201535 | 1 | 62.1  |        |
| <b>15Mg4H2O</b>       | -1073.9927983 | 0.2513476 | 0.274575 | 0.203087 | 0 | 53.9  |        |
| <b>16Mg4H2O</b>       | -1073.9770355 | 0.2518489 | 0.274032 | 0.204968 | 1 | 96.6  |        |
| <b>17Mg4H2O</b>       | -1074.0063674 | 0.2515294 | 0.274632 | 0.203762 | 0 | 18.8  | -26.8  |

|                     |               |           |          |          |   |       |
|---------------------|---------------|-----------|----------|----------|---|-------|
| <b>(17-H)Mg4H2O</b> | -1074.6772142 | 0.2680242 | 0.290470 | 0.221474 | 0 | -29.0 |
| <b>AdoH</b>         | -887.9623953  | 0.2506013 | 0.266590 | 0.207636 | 0 |       |
| <b>AdoR</b>         | -887.2897386  | 0.2356237 | 0.251919 | 0.191980 | 0 | -11.0 |

**Table S3.** Detailed results of *ab initio* and DFT energy calculations.

| Pubname             | MP2/6-311++G(3df,3p)//<br>B3LYP-6-31+G(d) |                      |                            | M06-2X/6-311++G(3df,3p)//<br>B3LYP-6-31+G(d) |                      |                            |
|---------------------|-------------------------------------------|----------------------|----------------------------|----------------------------------------------|----------------------|----------------------------|
|                     | Electronic energy<br>[Hartree]            | dE                   |                            | Electronic energy<br>[Hartree]               | dE                   |                            |
|                     |                                           | Etot+ZPE<br>[KJ/mol] | RSE<br>Etot+cH<br>[KJ/mol] |                                              | Etot+ZPE<br>[KJ/mol] | RSE<br>Etot+cH<br>[KJ/mol] |
| <b>1a</b>           | -769.7679067                              | 0.0                  |                            | -771.0892815                                 | 0.0                  |                            |
| <b>1b</b>           | -769.7657426                              | 6.8                  |                            | -771.0867597                                 | 7.8                  |                            |
| <b>3</b>            | -769.1124231                              | 0.0                  | -49.0                      | -770.4472803                                 | 0.0                  | -86.2                      |
| <b>4</b>            | -769.0496581                              | 160.0                |                            | -770.3903890                                 | 144.6                |                            |
| <b>5</b>            | -769.0691923                              | 110.4                |                            | -770.4039967                                 | 110.5                |                            |
| <b>6</b>            | -769.0534670                              | 149.3                |                            | -770.3919301                                 | 139.8                |                            |
| <b>7</b>            | -769.0337559                              | 199.5                |                            | -770.3748222                                 | 183.2                |                            |
| <b>8</b>            | -769.0663607                              | 116.6                | 70.3                       | -770.3978573                                 | 125.4                | 41.9                       |
| <b>9</b>            | -769.0313360                              | 206.1                |                            | -770.3707673                                 | 194.1                |                            |
| <b>10</b>           | -769.0892941                              | 55.0                 | -24.3                      | -770.4167629                                 | 74.4                 | -43.1                      |
| <b>(10-H)</b>       | -769.7633666                              | 10.4                 |                            | -771.0808282                                 | 20.7                 |                            |
| <b>11</b>           | -769.0863712                              | 61.3                 |                            | -770.4119943                                 | 85.6                 |                            |
| <b>12</b>           | -769.0915344                              | 48.8                 |                            | -770.4336819                                 | 29.7                 |                            |
| <b>1aHcis</b>       | -770.3039732                              | 6.6                  |                            | -771.6292950                                 | 6.1                  |                            |
| <b>3Hcis</b>        | -769.6751414                              | 0.0                  | -117.2                     | -771.0083368                                 | 0.0                  | -139.6                     |
| <b>10Hcis</b>       | -769.6359739                              | 96.3                 | -22.4                      | -770.9633002                                 | 111.8                | -30.3                      |
| <b>(10H-H)cis</b>   | -770.3103347                              | -11.7                |                            | -771.6318025                                 | -2.0                 |                            |
| <b>4Hcis</b>        | -769.6067704                              | 173.0                |                            | -770.9438884                                 | 162.7                |                            |
| <b>5Hcis</b>        | -769.6099247                              | 166.6                |                            | -770.9470691                                 | 156.2                |                            |
| <b>6Hcis</b>        | -769.6042619                              | 178.7                |                            | -770.9394536                                 | 173.5                |                            |
| <b>(10H-H)trans</b> | -770.3103347                              | -11.7                |                            | -771.6318025                                 | -2.0                 |                            |
| <b>1aHtrans</b>     | -770.3065977                              | 0.0                  |                            | -771.6317370                                 | 0                    |                            |
| <b>3Htrans</b>      | -769.6761920                              | -2.6                 | -113.0                     | -771.0083278                                 | 0.2                  | -133.2                     |
| <b>10Htrans</b>     | -769.6356773                              | 96.7                 | -16.8                      | -770.9623967                                 | 113.7                | -23.6                      |



|                      |               |       |       |               |       |        |
|----------------------|---------------|-------|-------|---------------|-------|--------|
| <b>4Htrans</b>       | -769.6065698  | 173.5 |       | -770.9430853  | 164.8 |        |
| <b>5Htrans</b>       | -769.6031981  | 184.2 |       | -770.9462451  | 158.3 |        |
| <b>6Htrans</b>       | -769.6031987  | 181.1 |       | -770.9385992  | 175.3 |        |
| <b>7Htrans</b>       | -769.5581783  | 298.2 |       | -770.9060296  | 259.7 |        |
| <b>13</b>            | -567.6529513  | 0.0   | -42.0 | -568.6469482  | 0.0   | -81.1  |
| <b>(13-H)</b>        | -568.3108820  | 0.0   |       | -569.2906999  | 0.0   |        |
| <b>14</b>            | -567.6204216  | 81.2  |       | -568.6095722  | 93.9  |        |
| <b>15</b>            | -567.6510697  | 3.0   |       | -568.6306809  | 40.8  |        |
| <b>16</b>            | --            |       |       |               |       |        |
| <b>17</b>            | -567.6412398  | 28.7  | 6.8   | -568.6270738  | 50.1  | -24.7  |
| <b>(17-H)</b>        | -568.3193667  | -19.5 |       | -569.293901   | -8.4  |        |
| <b>13H</b>           | -568.2037459  | 0.0   | -68.4 | -569.2011612  | 0.0   | -110.6 |
| <b>(13-H)H</b>       | -568.8510326  | 0.0   |       | -569.8330564  | 0.0   |        |
| <b>14H</b>           | -568.1578720  | 110.8 |       | -569.1484625  | 128.7 |        |
| <b>15H</b>           | -568.1759784  | 65.9  |       | -569.1581628  | 105.9 |        |
| <b>16H</b>           | -568.1745628  | 67.9  |       | -569.1567092  | 107.9 |        |
| <b>17H</b>           | -568.1723173  | 77.1  | -6.6  | -569.1599936  | 102.6 | -26.4  |
| <b>(17-H)H</b>       | -568.8528764  | -3.5  |       | -569.830149   | 9.0   |        |
| <b>1Mg4H2O</b>       | -1274.7013346 | 0.0   |       | -1276.8523835 | 0.0   |        |
| <b>3Mg4H2O</b>       | -1274.0332833 | 0.0   | -16.3 | -1276.1883456 | 0.0   | -28.6  |
| <b>4Mg4H2O</b>       | -1274.0016510 | 76.4  |       | -1276.1587206 | 71.2  |        |
| <b>5Mg4H2O</b>       | -1274.0103088 | 55.8  |       | -1276.1659933 | 54.2  |        |
| <b>6Mg4H2O</b>       | -1274.0041468 | 69.5  |       | -1276.1616392 | 63.1  |        |
| <b>10Mg4H2O</b>      | -1274.0345215 | -9.6  | -20.6 | -1276.1869873 | -2.8  | -27.3  |
| <b>(10-H)Mg4H2O</b>  | -1274.7095077 | -26.3 |       | -1276.8565391 | -15.7 |        |
| <b>1Mg3H2O</b>       | -1198.3484795 | 0.0   |       | -1200.3932758 | 0.0   |        |
| <b>(10-H)Mg3H2O</b>  | -1198.3583853 | -30.0 |       | -1200.4005109 | -23.0 |        |
| <b>3Mg3H2O</b>       | -1197.6810138 | 0.0   | -17.3 | -1199.731274  | 0.0   | -33.4  |
| <b>4Mg3H2O</b>       | -1197.6495265 | 75.5  |       | -1199.7026908 | 67.9  |        |
| <b>5Mg3H2O</b>       | -1197.6596528 | 51.5  |       | -1199.7109152 | 48.9  |        |
| <b>6Mg3H2O</b>       | -1197.6527105 | 67.2  |       | -1199.705897  | 59.5  |        |
| <b>10Mg3H2O</b>      | -1197.6824160 | -10.2 | -17.7 | -1199.729804  | -2.7  | -24.0  |
| <b>11Mg3H2O</b>      | -1197.612543  | 170.8 |       | -1199.675433  | 137.6 |        |
| <b>12Mg3H2O</b>      | -1197.630574  | 124.0 |       | -1199.701312  | 70.2  | 39.3   |
| <b>1HMg4H2O</b>      |               |       |       | -1277.1410783 | 0.0   |        |
| <b>(10-H)HMg4H2O</b> |               |       |       | -1277.1282543 | 24.94 |        |
| <b>3HMg4H2O</b>      |               |       |       | -1276.4834532 | 0.0   | -45.3  |
| <b>10HMg4H2O</b>     |               |       |       | -1276.4586681 | 57.05 | -30.7  |

|                       |               |       |        |               |       |        |
|-----------------------|---------------|-------|--------|---------------|-------|--------|
| <b>1Mg2H2OOH</b>      | -1197.9420448 | 0.0   |        | -1199.9856596 | 0     |        |
| <b>(10-H)Mg2H2OOH</b> | -1197.9467226 | -18.8 |        | -1199.9860073 | -7.4  |        |
| <b>3Mg2H2OOH</b>      | -1197.2746164 | 0.0   | -17.0  | -1199.3245129 | 0     | -35.3  |
| <b>4Mg2H2OOH</b>      | -1197.2384010 | 86.0  |        | -1199.2902867 | 80.8  |        |
| <b>5Mg2H2OOH</b>      | -1197.2464749 | 66.6  |        | -1199.3005095 | 55.7  |        |
| <b>6Mg2H2OOH</b>      | -1197.2467842 | 63.0  |        | -1199.2936046 | 71.1  |        |
| <b>10Mg2H2OOH</b>     | -1197.2730735 | -5.3  | -23.9  | -1199.3181662 | 7.3   | -37.9  |
| <b>13Mg4H2O</b>       | -1072.568111  | 0.0   | -30.8  | -1074.38742   | 0     | -64.8  |
| <b>(13-H)Mg4H2O</b>   | -1073.230314  | 0.0   |        | -1075.037349  | 0.0   |        |
| <b>14Mg4H2O</b>       | -1072.543978  | 53.4  |        | -1074.357199  | 69.4  |        |
| <b>15Mg4H2O</b>       | -1072.558507  | 18.6  |        | -1074.365812  | 50.2  |        |
| <b>16Mg4H2O</b>       | -1072.527744  | 97.0  |        | -1074.345768  | 100.3 |        |
| <b>17Mg4H2O</b>       | -1072.558505  | 22.7  | -30.0  | -1074.36677   | 51.7  | -25.8  |
| <b>(17-H)Mg4H2O</b>   | -1073.230314  |       |        | -1075.037349  |       |        |
| <b>3Ca4H2O</b>        | -1751.4486181 | 0.0   | -23.1  | -1753.740891  | 0.0   | -37.6  |
| <b>4Ca4H2O</b>        | -1751.4178947 | 73.7  |        | -1753.708345  | 78.4  |        |
| <b>5Ca4H2O</b>        | -1751.4272356 | 50.7  |        | -1753.715128  | 62.2  |        |
| <b>6Ca4H2O</b>        | -1751.418792  | 70.4  |        | -1753.710426  | 72.1  |        |
| <b>10Ca4H2O</b>       | -1751.447020  | -3.4  | -21.3  | -1753.735356  | 7.0   | -28.2  |
| <b>1Ca4H2O</b>        | -1752.113543  | 0.0   |        | -1754.400989  | 0.0   |        |
| <b>(10-H)Ca4H2O</b>   | -1752.121754  | -23.7 |        | -1754.404585  | -11.6 |        |
| <b>3Mn4H2O</b>        | -2224.288002  | 0.0   | -10.7  | -2227.043245  | 0.0   | -25.1  |
| <b>4Mn4H2O</b>        | -2224.256598  | 75.6  |        | -2227.011184  | 77.3  |        |
| <b>6Mn4H2O</b>        | -2224.256849  | 74.8  |        | -2227.013201  | 71.8  |        |
| <b>10Mn4H2O</b>       | -2224.288529  | -9.0  | -20.4  | -2227.039516  | 2.2   | -27.1  |
| <b>1Mn4H2O</b>        | -2224.958272  | 0.0   |        | -2227.708744  | 0.0   |        |
| <b>(10-H)Mn4H2O</b>   | -2224.963569  | -21.3 |        | -2227.709133  | -8.4  |        |
| <b>3Na3H2O</b>        | -1160.0472697 | 0.0   | -62.7  | -1162.081272  | 0.0   | -81.0  |
| <b>4Na3H2O</b>        | -1159.9895805 | 144.8 |        | -1162.032379  | 121.7 |        |
| <b>5Na3H2O</b>        | -1159.9987020 | 123.2 |        | -1162.042567  | 97.3  |        |
| <b>6Na3H2O</b>        | -1159.9959596 | 129.1 |        | -1162.035958  | 113.4 |        |
| <b>10Na3H2O</b>       | -1160.0269533 | 48.6  | -25.0  | -1162.060581  | 49.6  | -32.6  |
| <b>1Na3H2O</b>        | -1160.6974552 | 0.0   |        | -1162.725197  | 0.0   |        |
| <b>(10-H)Na3H2O</b>   | -1160.7001973 | -9.9  |        | -1162.728063  | -10.2 |        |
| <b>3K4H2O</b>         | -1673.9211341 | 0.0   | -104.1 | -1676.190428  | 0.0   | -119.5 |
| <b>4K4H2O</b>         | -1673.8620048 | 150.1 |        | -1676.138299  | 131.7 |        |
| <b>5K4H2O</b>         | -1673.8746251 | 118.0 |        | -1676.149664  | 102.9 |        |

|                    |               |       |       |              |       |       |
|--------------------|---------------|-------|-------|--------------|-------|-------|
| <b>6K4H2O</b>      | -1673.8689159 | 128.6 |       | -1676.144128 | 114.7 |       |
| <b>10NK4H2O</b>    | -1673.9014484 | 46.1  | -24.1 | -1676.165247 | 60.5  | -31.8 |
| <b>1K4H2O</b>      | -1674.5549344 | 0.0   |       | -1676.819029 | 0.0   |       |
| <b>(10-H)K4H2O</b> | -1674.5750984 | -52.2 |       | -1676.833108 | -36.2 |       |
| <b>AdoH</b>        | -887.6437597  |       | -11.5 |              |       |       |
| <b>AdoR</b>        | -888.3157534  |       |       |              |       |       |

**Table S4.** Important interatomic distances. Units in Ångstrom.

|               |                   | C4a-C6 | C4a-N5 | C6-N5 | C-O   | C6-C9 | C-Oa1 | C-Oa2 | N8-C7 | M-CO | M-COO |
|---------------|-------------------|--------|--------|-------|-------|-------|-------|-------|-------|------|-------|
| <b>1a</b>     | B3LYP/6-31+G(d)   | 2.462  | 1.386  | 1.461 | 1.238 | 1.575 | 1.258 | 1.257 |       |      |       |
|               | BMK/6-31+G(2df,p) | 2.446  | 1.384  | 1.452 | 1.223 | 1.575 | 1.243 | 1.243 |       |      |       |
| <b>1b</b>     | B3LYP/6-31+G(d)   | 2.409  | 1.405  | 1.472 | 1.240 | 1.584 | 1.256 | 1.260 |       |      |       |
|               | BMK/6-31+G(2df,p) | 2.390  | 1.405  | 1.465 | 1.224 | 1.582 | 1.242 | 1.246 |       |      |       |
| <b>3</b>      | B3LYP/6-31+G(d)   | 2.413  | 1.377  | 1.363 | 1.240 | 1.501 | 1.268 | 1.265 |       |      |       |
|               | BMK/6-31+G(2df,p) | 2.399  | 1.371  | 1.359 | 1.224 | 1.508 | 1.251 | 1.249 |       |      |       |
| <b>4</b>      | B3LYP/6-31+G(d)   | 1.801  | 1.456  | 1.440 | 1.232 | 1.528 | 1.258 | 1.262 |       |      |       |
|               | BMK/6-31+G(2df,p) | 1.830  | 1.446  | 1.438 | 1.217 | 1.531 | 1.244 | 1.247 |       |      |       |
| <b>5</b>      | B3LYP/6-31+G(d)   | 1.524  | 1.512  | 1.460 | 1.227 | 1.559 | 1.253 | 1.258 |       |      |       |
|               | BMK/6-31+G(2df,p) | 1.534  | 1.508  | 1.461 | 1.212 | 1.561 | 1.238 | 1.242 |       |      |       |
| <b>6</b>      | B3LYP/6-31+G(d)   | 1.503  | 1.787  | 1.449 | 1.228 | 1.572 | 1.252 | 1.258 |       |      |       |
|               | BMK/6-31+G(2df,p) | 1.502  | 1.800  | 1.444 | 1.213 | 1.573 | 1.238 | 1.243 |       |      |       |
| <b>7</b>      | B3LYP/6-31+G(d)   | 2.781  | 2.057  | 1.284 | 1.225 | 1.553 | 1.247 | 1.249 |       |      |       |
|               | BMK/6-31+G(2df,p) | 2.765  | 2.041  | 1.277 | 1.223 | 1.560 | 1.239 | 1.243 |       |      |       |
| <b>8</b>      | B3LYP/6-31+G(d)   |        |        | 1.277 | 1.235 | 1.561 | 1.256 | 1.256 |       |      |       |
|               | BMK/6-31+G(2df,p) |        |        | 1.269 | 1.220 | 1.567 | 1.240 | 1.240 |       |      |       |
| <b>9</b>      | B3LYP/6-31+G(d)   | 2.235  | 2.894  | 1.303 | 1.231 | 1.588 | 1.249 | 1.258 |       |      |       |
|               | BMK/6-31+G(2df,p) | 2.218  | 2.854  | 1.294 | 1.216 | 1.586 | 1.235 | 1.244 |       |      |       |
| <b>10</b>     | B3LYP/6-31+G(d)   | 1.519  | 2.542  | 1.389 | 1.234 | 1.789 | 1.232 | 1.240 |       |      |       |
|               | BMK/6-31+G(2df,p) | 1.527  | 2.518  | 1.402 | 1.218 | 1.688 | 1.226 | 1.233 |       |      |       |
| <b>11</b>     | BMK/6-31+G(2df,p) | 2.417  | 1.392  | 1.327 | 1.228 | 1.554 | 1.243 | 1.238 | 2.125 |      |       |
| <b>12</b>     | BMK/6-31+G(2df,p) | 2.569  | 1.357  | 1.376 | 1.220 | 1.575 | 1.248 | 1.234 | 2.996 |      |       |
| <b>1aHcis</b> | B3LYP/6-31+G(d)   | 2.445  | 1.404  | 1.451 | 1.235 | 1.521 | 1.353 | 1.212 |       |      |       |
|               | BMK/6-31+G(2df,p) | 2.427  | 1.400  | 1.444 | 1.219 | 1.524 | 1.335 | 1.200 |       |      |       |
| <b>3Hcis</b>  | B3LYP/6-31+G(d)   | 2.410  | 1.390  | 1.365 | 1.234 | 1.425 | 1.380 | 1.233 |       |      |       |
|               | BMK/6-31+G(2df,p) | 2.395  | 1.386  | 1.356 | 1.219 | 1.432 | 1.359 | 1.219 |       |      |       |
| <b>4Hcis</b>  | B3LYP/6-31+G(d)   | 1.673  | 1.463  | 1.455 | 1.229 | 1.464 | 1.361 | 1.225 |       |      |       |

|                     |                   |       |       |       |       |       |       |       |       |       |
|---------------------|-------------------|-------|-------|-------|-------|-------|-------|-------|-------|-------|
|                     | BMK/6-31+G(2df,p) | 1.658 | 1.457 | 1.450 | 1.213 | 1.474 | 1.340 | 1.209 |       |       |
| <b>5Hcis</b>        | B3LYP/6-31+G(d)   | 1.541 | 1.499 | 1.464 | 1.230 | 1.488 | 1.353 | 1.218 |       |       |
|                     | BMK/6-31+G(2df,p) | 1.551 | 1.495 | 1.465 | 1.214 | 1.491 | 1.334 | 1.204 |       |       |
| <b>6Hcis</b>        | B3LYP/6-31+G(d)   | 1.497 | 1.736 | 1.454 | 1.231 | 1.508 | 1.348 | 1.217 |       |       |
|                     | BMK/6-31+G(2df,p) | 1.493 | 1.731 | 1.450 | 1.215 | 1.511 | 1.330 | 1.201 |       |       |
| <b>10Hcis</b>       | B3LYP/6-31+G(d)   | 1.523 | 2.406 | 1.449 | 1.231 | 1.544 | 1.348 | 1.212 |       |       |
|                     | BMK/6-31+G(2df,p) | 1.522 | 2.395 | 1.442 | 1.217 | 1.544 | 1.330 | 1.199 |       |       |
| <b>1Htrans</b>      | B3LYP/6-31+G(d)   | 2.442 | 1.404 | 1.447 | 1.234 | 1.519 | 1.212 | 1.355 |       |       |
|                     | BMK/6-31+G(2df,p) | 2.424 | 1.401 | 1.440 | 1.218 | 1.521 | 1.198 | 1.337 |       |       |
| <b>3Htrans</b>      | B3LYP/6-31+G(d)   | 2.410 | 1.388 | 1.363 | 1.232 | 1.428 | 1.234 | 1.376 |       |       |
|                     | BMK/6-31+G(2df,p) | 2.394 | 1.383 | 1.354 | 1.217 | 1.434 | 1.219 | 1.356 |       |       |
| <b>4Htrans</b>      | B3LYP/6-31+G(d)   | 1.672 | 1.462 | 1.451 | 1.227 | 1.464 | 1.221 | 1.369 |       |       |
|                     | BMK/6-31+G(2df,p) | 1.659 | 1.456 | 1.446 | 1.211 | 1.472 | 1.205 | 1.348 |       |       |
| <b>5Htrans</b>      | B3LYP/6-31+G(d)   | 1.539 | 1.500 | 1.460 | 1.228 | 1.488 | 1.214 | 1.361 |       |       |
|                     | BMK/6-31+G(2df,p) | 1.552 | 1.494 | 1.460 | 1.212 | 1.491 | 1.200 | 1.342 |       |       |
| <b>6Htrans</b>      | B3LYP/6-31+G(d)   | 1.494 | 1.735 | 1.449 | 1.230 | 1.508 | 1.210 | 1.357 |       |       |
|                     | BMK/6-31+G(2df,p) | 1.491 | 1.733 | 1.445 | 1.214 | 1.510 | 1.197 | 1.339 |       |       |
| <b>7Htrans</b>      | B3LYP/6-31+G(d)   | 2.781 | 2.057 | 1.284 | 1.225 | 1.553 | 1.247 | 1.249 |       |       |
|                     | BMK/6-31+G(2df,p) | 2.813 | 2.224 | 1.272 | 1.214 | 1.511 | 1.199 | 1.338 |       |       |
| <b>10Htrans</b>     | B3LYP/6-31+G(d)   | 1.521 | 2.388 | 1.449 | 1.230 | 1.536 | 1.210 | 1.355 |       |       |
|                     | BMK/6-31+G(2df,p) | 1.520 | 2.381 | 1.442 | 1.216 | 1.537 | 1.197 | 1.337 |       |       |
| <b>(10-H)trans</b>  | B3LYP/6-31+G(d)   | 1.514 | 2.447 | 1.466 | 1.232 | 1.547 | 1.214 | 1.353 |       |       |
|                     | BMK/6-31+G(2df,p) | 1.507 | 2.447 | 1.458 | 1.219 | 1.543 | 1.200 | 1.336 |       |       |
| <b>13Hcis</b>       | BMK/6-31+G(2df,p) | 2.500 | 1.373 | 1.361 | 1.214 | 1.452 | 1.356 | 1.215 |       |       |
| <b>(13-H)H</b>      | BMK/6-31+G(2df,p) | 2.460 | 1.369 | 1.442 | 1.214 | 1.524 | 1.338 | 1.199 |       |       |
| <b>14H</b>          | BMK/6-31+G(2df,p) | 1.511 | 1.877 | 1.433 | 1.214 | 1.529 | 1.331 | 1.199 |       |       |
| <b>15H</b>          | BMK/6-31+G(2df,p) | 1.561 | 1.477 | 1.446 | 1.214 | 1.518 | 1.333 | 1.199 |       |       |
| <b>16H</b>          | BMK/6-31+G(2df,p) | 1.522 | 1.488 | 1.458 | 1.214 | 1.518 | 1.332 | 1.200 |       |       |
| <b>17H</b>          | BMK/6-31+G(2df,p) | 1.535 | 2.397 | 1.452 | 1.216 | 1.543 | 1.331 | 1.200 |       |       |
| <b>(17-H)H</b>      | BMK/6-31+G(2df,p) | 1.535 | 2.491 | 1.461 | 1.216 | 1.539 | 1.328 | 1.203 |       |       |
| <b>13Mg4H2O</b>     | BMK/6-31+G(2df,p) | 2.436 | 1.409 | 1.399 | 1.239 | 1.468 | 1.299 | 1.241 | 2.039 | 1.969 |
| <b>(13-H)Mg4H2O</b> | BMK/6-31+G(2df,p) | 2.517 | 1.397 | 1.486 | 1.241 | 1.542 | 1.280 | 1.233 | 2.032 | 1.969 |
| <b>14Mg4H2O</b>     | BMK/6-31+G(2df,p) | 1.864 | 1.448 | 1.419 | 1.245 | 1.510 | 1.279 | 1.235 | 2.017 | 1.970 |
| <b>15Mg4H2O</b>     | BMK/6-31+G(2df,p) | 1.591 | 1.472 | 1.440 | 1.243 | 1.527 | 1.275 | 1.231 | 2.011 | 1.973 |
| <b>16Mg4H2O</b>     | BMK/6-31+G(2df,p) |       |       |       |       |       |       |       |       |       |
| <b>17Mg4H2O</b>     | BMK/6-31+G(2df,p) | 1.526 | 2.404 | 1.443 | 1.238 | 1.596 | 1.270 | 1.218 | 2.030 | 1.995 |
| <b>(17-H)Mg4H2O</b> | BMK/6-31+G(2df,p) | 1.526 | 2.426 | 1.483 | 1.236 | 1.566 | 1.271 | 1.226 |       |       |
| <b>1Mg4H2O</b>      | B3LYP/6-31+G(d)   | 2.385 | 1.442 | 1.487 | 1.272 | 1.562 | 1.300 | 1.225 | 2.067 | 2.006 |
|                     | BMK/6-31+G(2df,p) | 2.366 | 1.435 | 1.479 | 1.257 | 1.563 | 1.284 | 1.212 | 2.032 | 1.961 |
| <b>3Mg4H2O</b>      | BMK/6-31+G(2df,p) | 2.305 | 1.418 | 1.400 | 1.271 | 1.484 | 1.294 | 1.231 | 2.066 | 1.972 |

|                     |                   |       |       |       |       |       |       |       |       |       |       |
|---------------------|-------------------|-------|-------|-------|-------|-------|-------|-------|-------|-------|-------|
| <b>4Mg4H2O</b>      | BMK/6-31+G(2df,p) | 1.735 | 1.451 | 1.440 | 1.270 | 1.483 | 1.286 | 1.234 |       | 2.002 | 1.966 |
| <b>5Mg4H2O</b>      | BMK/6-31+G(2df,p) | 1.528 | 1.526 | 1.466 | 1.272 | 1.512 | 1.276 | 1.229 |       | 1.991 | 1.984 |
| <b>6Mg4H2O</b>      | BMK/6-31+G(2df,p) | 1.501 | 1.699 | 1.452 | 1.271 | 1.523 | 1.275 | 1.228 |       | 1.996 | 1.986 |
| <b>10Mg4H2O</b>     | BMK/6-31+G(2df,p) | 1.534 | 2.389 | 1.441 | 1.266 | 1.555 | 1.276 | 1.225 |       | 2.001 | 1.976 |
| <b>(10-H)Mg4H2O</b> | BMK/6-31+G(2df,p) | 1.528 | 2.444 | 1.463 | 1.269 | 1.551 | 1.278 | 1.228 |       | 1.998 | 1.974 |
| <b>11Mg3H2O</b>     | BMK/6-31+G(2df,p) | 2.404 | 1.400 | 1.409 | 1.291 | 1.496 | 1.304 | 1.241 | 2.185 | 2.025 | 1.979 |
| <b>12Mg3H2O</b>     | BMK/6-31+G(2df,p) | 2.514 | 1.357 | 1.420 | 1.265 | 1.528 | 1.290 | 1.221 | 3.089 | 1.985 | 1.948 |

**Table S5.** Mulliken atomic Spin densities >0.1

|                 | C6    | C7    | N8    | C8a   | N1    | C2    | N3    | C4    | O-C4   | C4a   | N5    | O-COOMg |
|-----------------|-------|-------|-------|-------|-------|-------|-------|-------|--------|-------|-------|---------|
| <b>3</b>        | 0.635 |       |       | 0.110 |       | 0.153 |       |       |        |       |       |         |
| <b>4</b>        | 0.414 |       |       | 0.250 |       | 0.242 |       |       |        |       |       |         |
| <b>5</b>        |       |       | 0.099 | 0.331 |       | 0.435 |       |       |        |       |       |         |
| <b>6</b>        |       | 0.269 |       |       |       |       |       | 0.225 |        |       | 0.442 |         |
| <b>10</b>       | 0.129 |       |       |       |       |       |       | 0.111 |        |       | 0.746 |         |
| <b>3Htrans</b>  | 0.510 |       |       | 0.114 |       |       |       |       |        |       | 0.190 | 0.105   |
| <b>3Hcis</b>    | 0.454 |       |       | 0.214 |       |       |       |       |        |       |       |         |
| <b>4Htrans</b>  |       |       |       | 0.096 |       |       |       |       |        |       | 0.951 |         |
| <b>4Hcis</b>    |       |       |       | 0.127 |       |       |       |       |        |       | 0.946 |         |
| <b>5Htrans</b>  |       |       |       | 0.340 |       | 0.369 |       |       |        |       |       |         |
| <b>3Mg3H2O</b>  | 0.789 |       |       |       |       |       |       |       |        |       | 0.086 |         |
| <b>3Mg4H2O</b>  | 0.780 |       | 0.101 |       |       |       |       |       | 0.083  | 0.083 |       |         |
| <b>4Mg4H2O</b>  | 0.384 | 0.063 | 0.098 |       | 0.136 |       | 0.242 | 0.074 |        |       |       |         |
| <b>5Mg4H2O</b>  | 0.078 | 0.072 | 0.135 |       | 0.194 |       | 0.430 | 0.106 | -0.088 | 0.118 |       |         |
| <b>6Mg4H2O</b>  |       |       | 0.139 |       | 0.132 |       | 0.346 | 0.098 |        | 0.346 |       |         |
| <b>10Mg4H2O</b> |       |       |       |       |       |       | 0.101 |       |        | 0.959 |       |         |
| <b>11Mg4H2O</b> | 0.302 | 0.267 |       |       |       |       |       |       | 0.149  | 0.218 |       |         |
| <b>12Mg4H2O</b> |       | 0.149 |       |       |       |       | 0.119 |       | 0.384  | 0.240 |       |         |
| <b>3Na3H2O</b>  | 0.643 |       |       |       |       |       |       |       |        | 0.139 |       | 0.096   |
| <b>4Na3H2O</b>  | 0.412 | 0.083 | 0.201 |       | 0.213 |       | 0.090 |       |        |       |       |         |
| <b>5Na3H2O</b>  |       | 0.108 | 0.252 |       | 0.366 |       | 0.178 | 0.089 |        | 0.088 |       |         |
| <b>6Na3H2O</b>  |       |       | 0.233 |       | 0.216 |       | 0.146 |       |        | 0.359 |       |         |
| <b>10Na3H2O</b> |       |       | 0.106 |       |       |       |       |       |        | 0.955 |       |         |
| <b>3Ca4H2O</b>  | 0.740 |       |       |       |       |       |       |       |        | 0.110 |       | 0.123   |
| <b>4Ca4H2O</b>  | 0.385 |       | 0.108 |       | 0.151 |       | 0.204 |       |        | 0.056 |       |         |

|                   |       |       |       |       |       |       |       |       |
|-------------------|-------|-------|-------|-------|-------|-------|-------|-------|
| <b>5Ca4H2O</b>    | 0.078 |       | 0.156 | 0.228 | 0.371 | 0.102 | 0.114 |       |
| <b>6Ca4H2O</b>    |       |       | 0.164 | 0.154 | 0.295 | 0.095 | 0.340 |       |
| <b>10Ca4H2O</b>   |       |       |       |       | 0.107 |       | 0.954 |       |
| <b>13</b>         | 0.552 |       | 0.575 |       |       |       |       |       |
| <b>13Mg4H2O</b>   | 0.702 |       |       |       |       |       | 0.104 |       |
| <b>15Mg4H2O</b>   | 0.130 |       | 1.104 |       |       |       |       |       |
| <b>17H</b>        |       |       | 0.112 |       |       |       | 0.975 |       |
| <b>3</b>          | 0.656 |       | 0.108 | 0.113 |       |       |       |       |
| <b>5</b>          |       |       | 0.378 | 0.448 |       |       |       |       |
| <b>10</b>         |       |       |       |       |       |       | 0.827 |       |
| <b>3Hcis</b>      | 0.483 |       |       |       |       |       | 0.217 | 0.162 |
| <b>5Hcis</b>      | 0.122 |       | 0.384 | 0.321 |       |       |       |       |
| <b>6Hcis</b>      |       |       | 0.323 | 0.199 |       |       | 0.359 |       |
| <b>10Hcis</b>     |       |       |       |       |       |       | 0.927 |       |
| <b>3Htrans</b>    | 0.484 |       |       |       |       |       | 0.223 |       |
| <b>5Htrans</b>    | 0.135 |       | 0.394 | 0.318 |       |       |       |       |
| <b>10Htrans</b>   |       |       |       |       |       |       | 0.935 |       |
| <b>3Mg4H2O</b>    | 0.779 |       |       |       |       | 0.120 |       |       |
| <b>5Mg4H2O</b>    |       |       | 0.149 | 0.193 | 0.398 |       | 0.153 |       |
| <b>10Mg4H2O</b>   |       |       |       |       |       |       | 0.945 |       |
| <b>11Mg4H2O</b>   |       |       |       |       |       |       |       |       |
| <b>12Mg4H2O</b>   |       |       |       |       |       |       |       |       |
| <b>3Mg3H2O</b>    | 0.786 |       |       |       |       | 0.123 |       | 0.116 |
| <b>5Mg3H2O</b>    | 0.106 |       | 0.136 | 0.171 | 0.437 |       | 0.152 |       |
| <b>10Mg3H2O</b>   |       |       |       |       |       |       | 0.946 |       |
| <b>3Mg2H2OOH</b>  | 0.818 |       |       |       |       | 0.118 |       |       |
| <b>5Mg2H2OOH</b>  |       | 0.100 | 0.259 | 0.327 | 0.209 |       | 0.122 |       |
| <b>10Mg2H2OOH</b> |       |       |       |       |       |       | 0.939 |       |
| <b>13</b>         | 0.563 |       | 0.523 |       |       |       |       |       |
| <b>15</b>         | 0.158 |       | 1.008 |       |       |       |       |       |
| <b>17</b>         |       |       |       |       |       |       | 0.931 |       |
| <b>13H</b>        | 0.545 |       | 0.303 |       |       |       | 0.111 |       |
| <b>15H</b>        | 0.130 |       | 1.117 |       |       |       |       |       |
| <b>17H</b>        |       |       | 0.112 |       |       |       | 0.975 |       |
| <b>13Mg4H2O</b>   | 0.694 |       |       |       |       | 0.104 | 0.102 | 0.126 |
| <b>15Mg4H2O</b>   | 0.169 |       |       |       |       | 0.998 |       |       |
| <b>17Mg4H2O</b>   |       |       |       |       |       |       | 0.932 |       |

**Table S6.** Detailed results of *ab initio* and DFT calculations. G3B3 results.

| Name            | G3B3        |             |                      |                     |       |
|-----------------|-------------|-------------|----------------------|---------------------|-------|
|                 | Enthalp     | Energy (0K) | dE                   | RSE                 |       |
|                 |             |             | Etot+ZPE<br>[KJ/mol] | Etot+cH<br>[KJ/mol] | nimag |
| <b>1a</b>       | -770.642442 | -770.656823 | 0.0                  |                     | 0     |
| <b>3</b>        | -770.010631 | -770.024792 | 0.0                  | -86.9               | 0     |
| <b>1aHtrans</b> | -771.172803 | -771.187029 | 0.0                  |                     | 0     |
| <b>3Htrans</b>  | -770.553838 | -770.568119 | 0.0                  | -120.7              | 0     |
| <b>10Htrans</b> | -770.518173 | -770.532871 | 92.5                 | -20.9               | 0     |
| <b>4Htrans</b>  | -770.493756 | -770.507487 | 159.2                |                     | 1     |
| <b>5Htrans</b>  | -770.496355 | -770.510492 | 151.3                |                     | 0     |
| <b>6Htrans</b>  | -770.496353 | -770.510491 | 151.3                |                     | 0     |
| <b>13H</b>      | -568.847307 | -568.860211 | 0                    | -100.8              | 0     |
| <b>(13-H)H</b>  | -569.473844 | -569.474788 |                      |                     | 0     |
| <b>14H</b>      | -568.800441 | -568.813332 | 123.1                |                     | 1     |
| <b>15H</b>      | -568.807177 | -568.820278 | 104.8                |                     | 0     |
| <b>16H</b>      | -568.806786 | -568.8195   | 106.9                |                     | 1     |
| <b>17H</b>      | -568.816851 | -568.817795 | 111.4                | -20.8               | 0     |

**Table S7.** Calculated relative energies for the radical rearrangements of **3** complexed to different ions

|                                                  | B3LYP/<br>6-31+G(d) <sup>[a]</sup> | MP2 <sup>[b]</sup> | M06-2X <sup>[b]</sup> |
|--------------------------------------------------|------------------------------------|--------------------|-----------------------|
| <b>3Ca<sub>4</sub>H<sub>2</sub>O</b>             | 0.0                                | 0.0                | 0.0                   |
| <b>4Ca<sub>4</sub>H<sub>2</sub>O<sup>‡</sup></b> | 85.5                               | 73.3               | 78.4                  |
| <b>5Ca<sub>4</sub>H<sub>2</sub>O</b>             | 74.0                               | 50.7               | 62.2                  |
| <b>6Ca<sub>4</sub>H<sub>2</sub>O<sup>‡</sup></b> | 77.2                               | 70.4               | 72.1                  |
| <b>10Ca<sub>4</sub>H<sub>2</sub>O</b>            | 9.1                                | -3.4               | 7.0                   |
| <b>3Mn<sub>4</sub>H<sub>2</sub>O</b>             | 0.0                                | 0.0                | 0.0                   |
| <b>4Mn<sub>4</sub>H<sub>2</sub>O<sup>‡</sup></b> | 79.4                               | 75.6               | 77.3                  |
| <b>6Mn<sub>4</sub>H<sub>2</sub>O<sup>‡</sup></b> | 74.7                               | 74.8               | 71.8                  |
| <b>10Mn<sub>4</sub>H<sub>2</sub>O</b>            | 0.5                                | -9.0               | 2.2                   |
| <b>3K<sub>4</sub>H<sub>2</sub>O</b>              | 0.0                                | 0.0                | 0.0                   |
| <b>4K<sub>4</sub>H<sub>2</sub>O<sup>‡</sup></b>  | 142.9                              | 150.1              | 131.7                 |
| <b>5K<sub>4</sub>H<sub>2</sub>O</b>              | 124.5                              | 118.0              | 102.9                 |

|                                                  |       |       |       |
|--------------------------------------------------|-------|-------|-------|
| <b>6K<sub>4</sub>H<sub>2</sub>O<sup>‡</sup></b>  | 131.0 | 128.6 | 114.7 |
| <b>10k<sub>4</sub>H<sub>2</sub>O</b>             | 66.6  | 46.1  | 60.5  |
| <b>3Na<sub>3</sub>H<sub>2</sub>O</b>             | 0.0   | 0.0   | 0.0   |
| <b>4Na<sub>3</sub>H<sub>2</sub>O<sup>‡</sup></b> | 130.5 | 144.8 | 121.7 |
| <b>5Na<sub>3</sub>H<sub>2</sub>O</b>             | 122.6 | 123.2 | 97.3  |
| <b>6Na<sub>3</sub>H<sub>2</sub>O<sup>‡</sup></b> | 128.7 | 129.1 | 113.4 |
| <b>10Na<sub>3</sub>H<sub>2</sub>O</b>            | 62.7  | 48.6  | 49.6  |

**Table S8.** Calculated radical stabilization enthalpies the rearrangement of **3** complexed to different ions at 298.15 K.

|                                       | B3LYP/<br>6-31+G(d) <sup>[a]</sup> | MP2 <sup>[b]</sup> | M06-2X <sup>[b]</sup> |
|---------------------------------------|------------------------------------|--------------------|-----------------------|
| <b>3Ca<sub>4</sub>H<sub>2</sub>O</b>  | -64.3                              | -23.1              | -37.6                 |
| <b>10Ca<sub>4</sub>H<sub>2</sub>O</b> | -35.5                              | -21.3              | -28.2                 |
| <b>3Mn<sub>4</sub>H<sub>2</sub>O</b>  | -49.9                              | -10.7              | -25.1                 |
| <b>10Mn<sub>4</sub>H<sub>2</sub>O</b> | -33.7                              | -20.4              | -27.1                 |
| <b>3K<sub>4</sub>H<sub>2</sub>O</b>   | -136.8                             | -104.1             | -119.5                |
| <b>10K<sub>4</sub>H<sub>2</sub>O</b>  | -36.9                              | -24.1              | -31.8                 |
| <b>3Na<sub>3</sub>H<sub>2</sub>O</b>  | -96.6                              | -62.7              | -81.0                 |
| <b>10Na<sub>3</sub>H<sub>2</sub>O</b> | -39.1                              | -25.0              | -32.6                 |

[a] All radical energies are given in kJ mol<sup>-1</sup>; absolute energies are given in the supporting information; B3LYP, ROMP2, M06-2X energies are corrected with B3LYP/6-31+G(d) enthalpy corrections (BMK values with BMK/6-31+G(2df,p) enthalpy corrections respectively).[b] basis set 6-311++G(3df,3p).

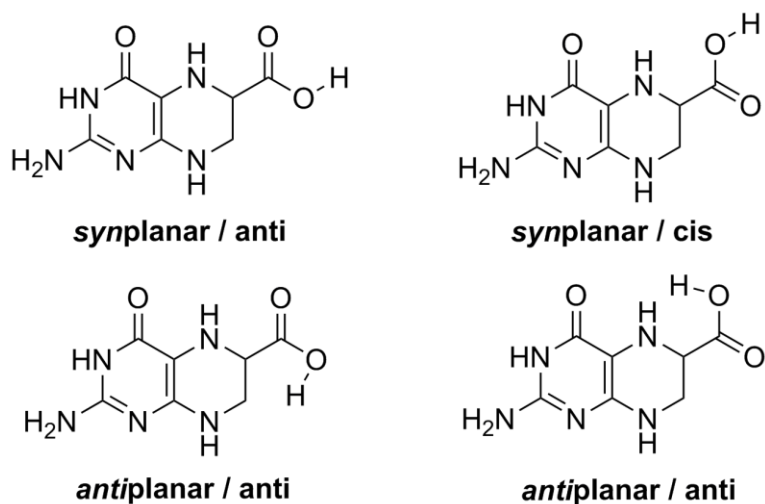

**Scheme S1.** Conformer nomenclature of CPH4.
